# Supplementary material for: Influence of Biospecimen Variables on Proteomic Biomarkers in Breast Cancer
Source: Oxford University Press journal article supplement (doi:10.1158/1078-0432.ccr-13-1507), 2014-06-03
Supplement: 10780432ccr131507-sup-114451_3_supp_2438094_n4ftxl.xlsx [file 10780432ccr131507-sup-114451_3_supp_2438094_n4ftxl.xlsx]

## Sheet: Sheet1
Antibody Name	Company	Catalog Number	Dilution
14-3-3 epsilon	Santa Cruz Biotechnology, Inc.	sc-2395	250
p4E-BP1 S65	Cell Signaling Technology, Inc.	9456	250
p4E-BP1 T37/46	Cell Signaling Technology, Inc.	9459	500
p4E-BP1 T70*	Cell Signaling Technology, Inc.	9455	200
4E-BP1	Cell Signaling Technology, Inc.	9452	100
53BP1	Cell Signaling Technology, Inc.	4937	200
alpha-Catenin*	Calbiochem	CA1030	800
pACC1 S79	Cell Signaling Technology, Inc.	3661	250
ACC1	Epitomics, Inc.	1768	250
AIB1*	BD Biosciences	6111105	100
pAkt S473	Cell Signaling Technology, Inc.	9271	250
pAkt T308	Cell Signaling Technology, Inc.	9275	250
Akt	Cell Signaling Technology, Inc.	9272	250
pAMPK-alpha T172	Cell Signaling Technology, Inc.	2535	250
AMPK-alpha	Cell Signaling Technology, Inc.	2532	500
Annexin I	Invitrogen	71-3400	90000
AR	Epitomics, Inc.	1852	100
beta-Catenin	Cell Signaling Technology, Inc.	9562	800
pBAD S112	Cell Signaling Technology, Inc.	9291	200
BAK	Epitomics, Inc.	1542	100
Bax	Cell Signaling Technology, Inc.	2772	250
pBcl-2 S70*	Cell Signaling Technology, Inc.	2762	100
Bcl-2	Dako	M0887	100
Bcl-x*	Epitomics, Inc.	1018	250
Bcl-xL	Cell Signaling Technology, Inc.	2762	100
Beclin-1	Santa Cruz Biotechnology, Inc.	sc-10086	100
BID	Epitomics, Inc.	1008	100
Bim	Epitomics, Inc.	1036	100
p-c-Jun S73	Cell Signaling Technology, Inc.	9164	100
c-Kit	Epitomics, Inc.	1522	100
p-c-Met Y1235	Cell Signaling Technology, Inc.	3129	500
c-Met*	Cell Signaling Technology, Inc.	3127	500
c-Myc	Cell Signaling Technology, Inc.	9402	250
p-C-Raf S338	Cell Signaling Technology, Inc.	9427	250
C-Raf	EMD Millipore	06-248	2000
Caspase-3 active*	Epitomics, Inc.	1476	250
Caspase-7 cleaved D198	Cell Signaling Technology, Inc.	9491	100
Caspase-9 cleaved D330*	Cell Signaling Technology, Inc.	9501	250
Caveolin-1	Cell Signaling Technology, Inc.	3238	500
CD31	Dako	M0823	100
CDK1	Cell Signaling Technology, Inc.	9112	250
pChk1 S345	Cell Signaling Technology, Inc.	2348	100
Chk1	Cell Signaling Technology, Inc.	2345	400
Chk2	Cell Signaling Technology, Inc.	3440	300
cIAP	EMD Millipore	07-759	250
Claudin 7	Novus Biologicals	NB100-91714	250
Collagen VI	Santa Cruz Biotechnology, Inc.	sc-20649	400
COMT*	SDIX	GA271	15000
Cox-2*	Epitomics, Inc.	2169	100
Cyclin B1	Epitomics, Inc.	1495	500
Cyclin D1	Santa Cruz Biotechnology, Inc.	sc-718	500
Cyclin E1	Santa Cruz Biotechnology, Inc.	sc-247	100
DJ1/PARK	Abcam, Inc.	ab76008	10000
Dvl3	Cell Signaling Technology, Inc.	3218	100
E-Cadherin	Cell Signaling Technology, Inc.	4065	250
eEF2	Cell Signaling Technology, Inc.	2332	100
eEF2K	Cell Signaling Technology, Inc.	3692	250
pEGFR Y1068	Cell Signaling Technology, Inc.	2234	100
pEGFR Y1173	Epitomics, Inc.	1124	100
pEGFR Y992*	Cell Signaling Technology, Inc.	2235	200
EGFR	Santa Cruz Biotechnology, Inc.	sc-03	400
eIF4E	Cell Signaling Technology, Inc.	9742	150
eIF4G	Cell Signaling Technology, Inc.	2498	100
ER-alpha	Lab Vision	RM-9101-S	200
ERCC1*	Lab Vision	MS-671-PO	100
FAK*	Epitomics, Inc.	1700	250
Fibronectin	Epitomics, Inc.	1574	4800
pFoxO3a S318/321	Cell Signaling Technology, Inc.	9465	250
FoxO3a	Cell Signaling Technology, Inc.	9467	500
GATA3	BD Biosciences	558686	100
pGSK3a/b S21/9	Cell Signaling Technology, Inc.	9331	250
GSK3-alpha/beta	Santa Cruz Biotechnology, Inc.	sc-7291	2000
pGSK3b S9	Cell Signaling Technology, Inc.	9336	250
Hamartin*	Cell Signaling Technology, Inc.	4906	100
HER2	Lab Vision/NeoMarkers	MS-325-P1	250
pHER3 Y1298	Cell Signaling Technology, Inc.	4791	250
HER3	Santa Cruz Biotechnology, Inc.	sc-285	250
IGF-1Rb*	Cell Signaling Technology, Inc.	3027	250
IGFBP2	Cell Signaling Technology, Inc.	3922	100
INPP4B	Santa Cruz Biotechnology, Inc.	sc-12318	100
IRS	EMD Millipore	06-248	250
pJNK T183/185	Cell Signaling Technology, Inc.	4668	100
JNK2	Cell Signaling Technology, Inc.	4672	100
K-Ras*	Santa Cruz Biotechnology, Inc.	sc-30	100
p44/42 MAPK T202/204	Cell Signaling Technology, Inc.	4377	1000
pMEK1/2 S217/221	Cell Signaling Technology, Inc.	9154	500
MEK1	Epitomics, Inc.	1235	15000
MSH2*	Cell Signaling Technology, Inc.	2850	100
MSH6*	SDIX	2203.00.02	1000
p-mTOR S2448	Cell Signaling Technology, Inc.	2971	250
mTOR	Cell Signaling Technology, Inc.	2983	400
N-Cadherin	Cell Signaling Technology, Inc.	4061	200
pNF-kappa B p65 S538	Cell Signaling Technology, Inc.	3033	100
NF2	SDIX	2217.00.02	500
Notch1	Cell Signaling Technology, Inc.	3268	100
Notch3*	Santa Cruz Biotechnology, Inc.	sc-5593	400
P-Cadherin*	Cell Signaling Technology, Inc.	2130	250
p21	Santa Cruz Biotechnology, Inc.	sc-397	100
p-p27 T157	R&D Systems	AF1555	250
p-p27 T198	Abcam, Inc.	ab64949	100
p27	Epitomics, Inc.	1591	100
p-p38 MAPK T180/182	Cell Signaling Technology, Inc.	9211	100
p38 MAPK	Cell Signaling Technology, Inc.	9212	300
p53	Cell Signaling Technology, Inc.	9282	10000
pP90RSK T359/363	Cell Signaling Technology, Inc.	9344	500
PARP cleaved*	Cell Signaling Technology, Inc.	9546	100
Paxillin	Epitomics, Inc.	1500	500
PCNA	Abcam, Inc.	ab29	500
Pdcd4	Rockland Immunochemicals, Inc.	600-401-965	300
pPDK1 S241	Cell Signaling Technology, Inc.	3061	250
PI3K p110a	Epitomics, Inc.	1683	100
PI3K p85	EMD Millipore	06-195	10000
pPKC (pan) bII S660	Cell Signaling Technology, Inc.	9371	100
pPKCa S657	EMD Millipore	06-822	1000
PKCa	EMD Millipore	05-154	1000
PR	Epitomics, Inc.	1483	200
PRAS40 T246	Life Technologies/Biosource	441100G	4000
PTCH*	SDIX	2113.00.02	1000
PTEN	Cell Signaling Technology, Inc.	9552	500
Rab11	Cell Signaling Technology, Inc.	3539	250
Rab25	Covance Inc.	N/A (custom)	3000
Rad51*	EMD Millipore	05-525	100
Rad50	EMD Millipore/Calbiochem	na 71	120
pRb S807/811	Cell Signaling Technology, Inc.	9308	250
Rb*	Cell Signaling Technology, Inc.	9309	200
pS6 S235/236	Cell Signaling Technology, Inc.	2211	3000
pS6 S240/244	Cell Signaling Technology, Inc.	2215	2000
S6*	Cell Signaling Technology, Inc.	2217	250
pS6K1 T389	Cell Signaling Technology, Inc.	9205	150
S6K1	Epitomics, Inc.	1494	1000
SCD1	Santa Cruz Biotechnology, Inc.	sc-58420	250
Smac*	Cell Signaling Technology, Inc.	2954	250
Smad1	Epitomics, Inc.	1649	250
Smad3	Epitomics, Inc.	1735	100
Smad4	Santa Cruz Biotechnology, Inc.	sc-7866	100
Snail*	Cell Signaling Technology, Inc.	3895	100
pSrc Y527	Cell Signaling Technology, Inc.	2105	250
Src	EMD Millipore	05-184	200
pStat3 Y705	Cell Signaling Technology, Inc.	9131	100
Stat5a	Epitomics, Inc.	1289	250
Stathmin	Epitomics, Inc.	1972	100
Syk	Santa Cruz Biotechnology, Inc.	sc-1204	250
pTaz S89*	Santa Cruz Biotechnology, Inc.	sc-17610	100
TIGAR	Epitomics, Inc.	1711	250
TTF1	Epitomics, Inc.	2044	250
Tuberin	Epitomics, Inc.	1613	500
VASP*	Cell Signaling Technology, Inc.	3112	100
VEGFR2	Cell Signaling Technology, Inc.	2479	4800
XIAP*	Cell Signaling Technology, Inc.	2042	100
XRCC1	Cell Signaling Technology, Inc.	2735	100
pYAP S127	Cell Signaling Technology, Inc.	4911	350
YAP	Santa Cruz Biotechnology, Inc.	sc-15407	250
pYB1 S102	Cell Signaling Technology, Inc.	2900	150
YB1	SDIX	1725.00,02	500
RPPA antibody panel is dynamic and some antibodies have been removed from the panel of RPPA-approved antibodies since this study was completed. Antibodies are removed from RPPA-approved list when they no longer meet the expected criteria. The major reasons to stop using an antibody are: (1) the antibody is no longer available, it is discontinued by the company, (2) lot number is changed and the n…
