# Supplementary material for: Influence of Biospecimen Variables on Proteomic Biomarkers in Breast Cancer
Source: Oxford University Press journal article supplement (doi:10.1158/1078-0432.ccr-13-1507), 2014-06-03
Supplement: 10780432ccr131507-sup-114451_3_supp_2438096_n4ftxl.docx [file 10780432ccr131507-sup-114451_3_supp_2438096_n4ftxl.docx]

Supplementary Table 4. Patient and Tumor Characteristics

| Factor | N | % |
| --- | --- | --- |
| Age (years)  Median  Range | 51  29-88 |  |
| Histology  IDC  ILC  Mixed  Other | 41  3  1  5 | 82%  6%  2%  10% |
| Clinical Stage  I  II  III | 9  34  7 | 18% 68%14% |
| Nuclear gradeǂ  1  2  3 | 12  17  15 | 27%  39%  34% |
| Tumor subtype  ER+ or PR+ and HER2 –  HER2 +  Triple negative | 39  8  3 | 78%  16%  6% |
| Lymphovascular invasion  Present  Absent/Unknown | 18  32 | 36%  64% |
| Multifocal/multicentric disease  Yes  No | 8  42 | 16%  84% |
| Neoadjuvant chemotherapy  No  Yes | 39  11 | 78%  22% |
| Surgery performed  Breast conservation  Mastectomy  Modified radical mastectomy | 10  31  9 | 20%  62%  18% |
| Time to specimen freezing (min)  Median  Range | 37  8-157 |  |
| Pathology size* (cm)  Mean  Median  Range | 3.6  2.8  0.7-11 |  |
| Pathologic nodal status  Positive  Negative | 28  22 | 56%  44% |

ǂ there are 6 cases where nuclear grade was not given in the pathology report.

*For patients with multifocal or multicentric disease, the tumor size and characteristics of the tumor that was biopsied was noted.
