# Supplementary material for: Influence of Biospecimen Variables on Proteomic Biomarkers in Breast Cancer
Source: Oxford University Press journal article supplement (doi:10.1158/1078-0432.ccr-13-1507), 2014-06-03
Supplement: 10780432ccr131507-sup-114451_3_supp_2438103_n4ftxm.docx [file 10780432ccr131507-sup-114451_3_supp_2438103_n4ftxm.docx]

Supplementary Table 11: Comparison of the correlation of biomarker expression by RPPA in CNB and FNA with Central and Peripheral samples based on whether neoadjuvant chemotherapy had been administered.

|  | Wilcoxon signed rank test | |  |
| --- | --- | --- | --- |
|  | Statistics | P-value | Figure |
| Central vs. Peripheral | 921 | <0.0001 | 1 |
| Core vs. Central | 3872 | <0.0001 | 2 |
| Core vs. Surgical specimen | 3396 | <0.0001 | 3 |
| FNA vs. Core | 3748 | <0.0001 | 4 |
| FNA vs. Central | 5898.5 | 0.5078 | 5 |
| FNA vs. Peripheral | 7611 | 0.0209 | 6 |
| FNA vs. Surgical specimen | 6556 | 0.6331 | 7 |


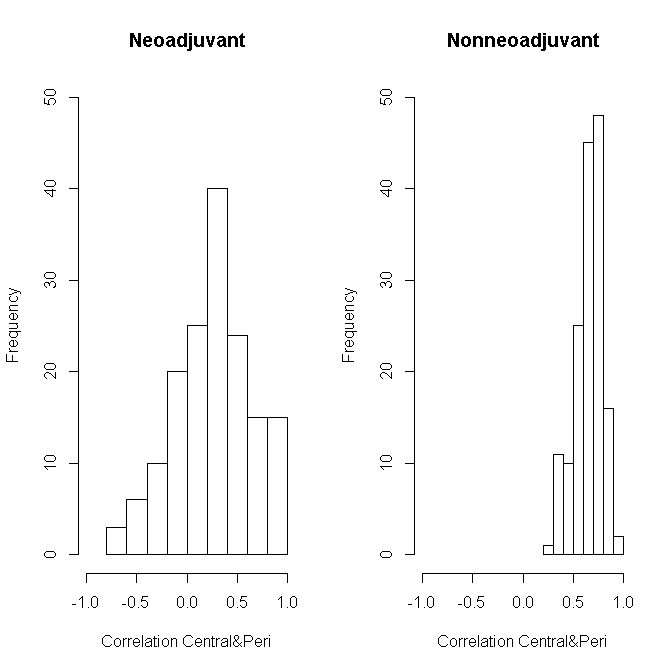


Figure 1: Comparing the correlation of protein expressions in Central and Peripheral samples between neoadjuvant and nonneoadjuvant patients (P<0.0001).


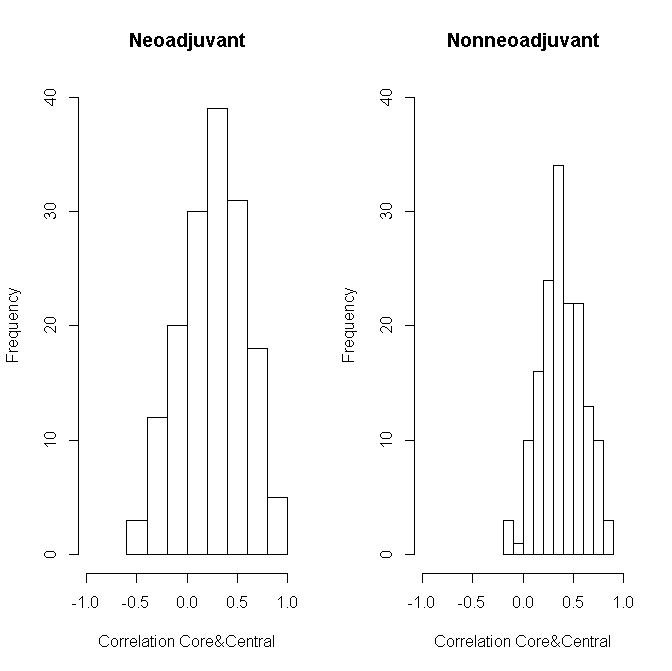


Figure 2: Comparing the correlation of protein expressions in Core and Central samples between neoadjuvant and nonneoadjuvant patients (P<0.0001).


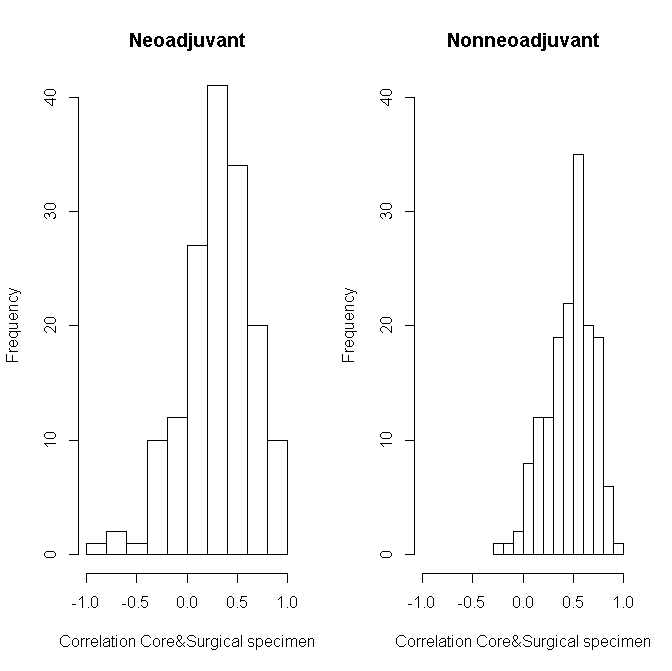


Figure 3: Comparing the correlation of protein expressions in Core and Surgical specimen samples between neoadjuvant and nonneoadjuvant patients (P<0.0001)


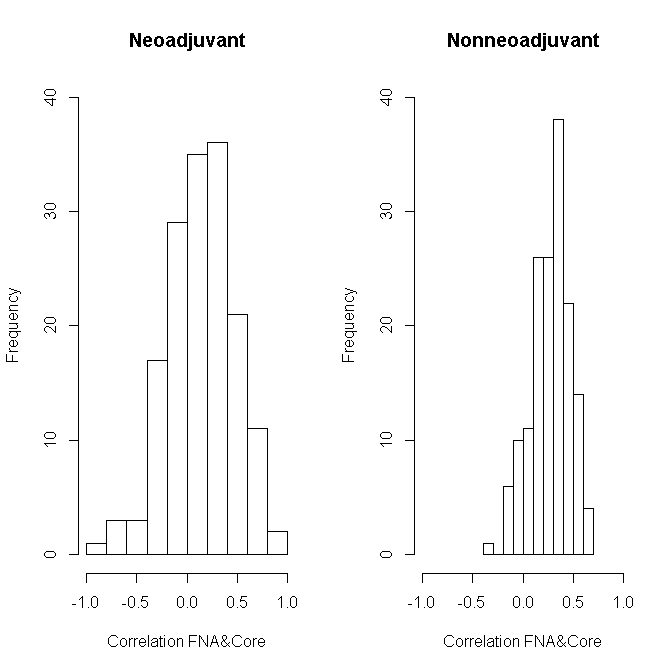


Figure 4: Comparing the correlation of protein expressions in FNA and Core samples between neoadjuvant and nonneoadjuvant patients (P<0.0001).


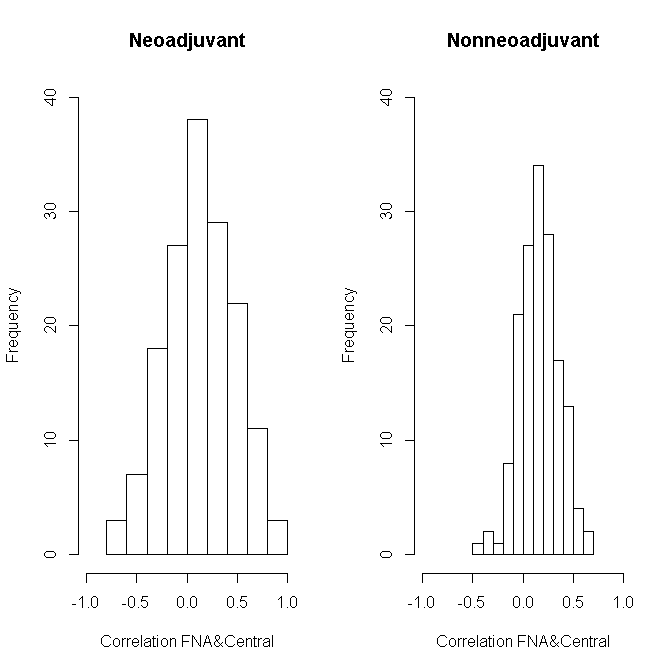


Figure 5: Comparing the correlation of protein expressions in FNA and Central samples between neoadjuvant and nonneoadjuvant patients (P=0.5078).


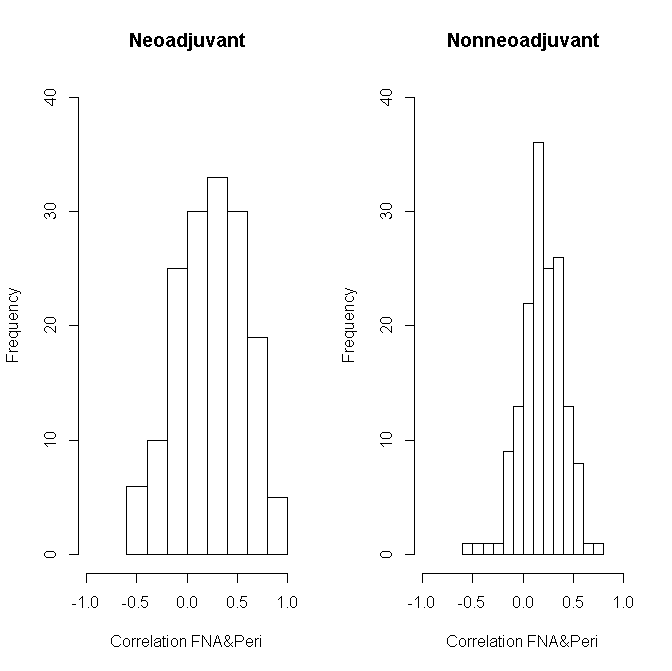


Figure 6: Comparing the correlation of protein expressions in FNA and Peripheral samples between neoadjuvant and nonneoadjuvant patients (P=0.0209).


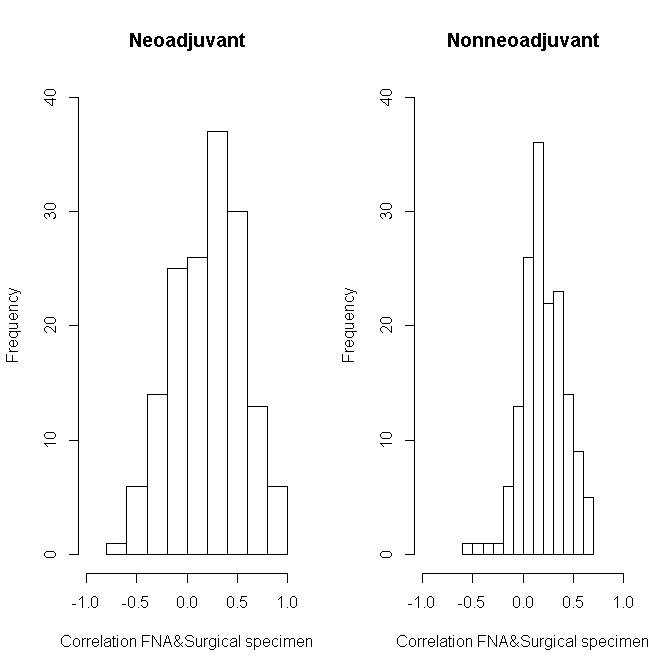


Figure 7: Comparing the correlation of protein expressions in FNA and Surgical specimen samples between neoadjuvant and nonneoadjuvant patients (P=0.6331).
